# Supplementary material
Source: MDPI journal article supplement (https://www.mdpi.com/2075-5309/13/3/731)
Supplement: s1 [file s1]

**Table S1.** The solar irradiation values for building and window types in Erzurum and Antalya

| City    | Month     | Type-A/C  |           |           |           |           |           | Type-B/D |          |          |          |          |          |
|---------|-----------|-----------|-----------|-----------|-----------|-----------|-----------|----------|----------|----------|----------|----------|----------|
|         |           | Type-0    | Type-1    | Type-2    | Type-3    | Type-4    | Type-5    | Type-0   | Type-1   | Type-2   | Type-3   | Type-4   | Type-5   |
| Erzurum | January   | 3,508.26  | 4,073.87  | 4,356.67  | 4,639.48  | 4,790.26  | 4,941.05  | 1,949.04 | 2,263.26 | 2,420.37 | 2,577.49 | 2,661.26 | 2,745.03 |
|         | February  | 6,066.06  | 7,010.41  | 7,482.58  | 7,954.75  | 8,245.89  | 8,537.04  | 3,370.03 | 3,894.67 | 4,156.99 | 4,419.31 | 4,581.05 | 4,742.80 |
|         | March     | 6,884.59  | 7,943.45  | 8,472.88  | 9,002.31  | 9,344.42  | 9,686.53  | 3,824.77 | 4,413.03 | 4,707.16 | 5,001.28 | 5,191.34 | 5,381.40 |
|         | April     | 6,545.23  | 7,550.97  | 8,053.83  | 8,556.70  | 8,882.79  | 9,208.88  | 3,636.24 | 4,194.98 | 4,474.35 | 4,753.72 | 4,934.88 | 5,116.04 |
|         | May       | 6,801.44  | 7,823.74  | 8,334.90  | 8,846.05  | 9,205.53  | 9,565.00  | 3,778.58 | 4,346.52 | 4,630.50 | 4,914.47 | 5,114.18 | 5,313.89 |
|         | June      | 8,421.54  | 9,644.02  | 10,255.26 | 10,866.50 | 11,350.81 | 11,835.12 | 4,678.63 | 5,357.79 | 5,697.37 | 6,036.95 | 6,306.01 | 6,575.07 |
|         | July      | 9,983.61  | 11,436.07 | 12,162.31 | 12,888.54 | 13,459.76 | 14,030.97 | 5,546.45 | 6,353.37 | 6,756.84 | 7,160.30 | 7,477.64 | 7,794.99 |
|         | August    | 11,136.44 | 12,868.94 | 13,735.18 | 14,601.43 | 15,137.01 | 15,672.58 | 6,186.91 | 7,149.41 | 7,630.66 | 8,111.91 | 8,409.45 | 8,706.99 |
|         | September | 10,734.91 | 12,546.51 | 13,452.31 | 14,358.11 | 14,746.31 | 15,134.51 | 5,963.84 | 6,970.28 | 7,473.50 | 7,976.73 | 8,192.39 | 8,408.06 |
|         | October   | 8,091.12  | 9,519.69  | 10,233.98 | 10,948.27 | 11,183.75 | 11,419.23 | 4,495.07 | 5,288.72 | 5,685.55 | 6,082.37 | 6,213.19 | 6,344.02 |
|         | November  | 5,374.56  | 6,335.17  | 6,815.48  | 7,295.78  | 7,441.64  | 7,587.50  | 2,985.87 | 3,519.54 | 3,786.38 | 4,053.21 | 4,134.25 | 4,215.28 |
|         | December  | 2,887.60  | 3,372.97  | 3,615.65  | 3,858.34  | 3,964.51  | 4,070.68  | 1,604.22 | 1,873.87 | 2,008.70 | 2,143.52 | 2,202.51 | 2,261.49 |
| Antalya | January   | 5,424.97  | 6,384.18  | 6,863.79  | 7,343.39  | 7,500.03  | 7,656.68  | 3,013.87 | 3,546.77 | 3,813.21 | 4,079.66 | 4,166.69 | 4,253.71 |
|         | February  | 6,567.51  | 7,689.16  | 8,249.99  | 8,810.82  | 9,036.25  | 9,261.68  | 3,648.62 | 4,271.76 | 4,583.33 | 4,894.90 | 5,020.14 | 5,145.38 |
|         | March     | 7,560.04  | 8,815.10  | 9,442.63  | 10,070.16 | 10,362.32 | 10,654.49 | 4,200.02 | 4,897.28 | 5,245.90 | 5,594.53 | 5,756.85 | 5,919.16 |
|         | April     | 8,122.43  | 9,423.82  | 10,074.52 | 10,725.21 | 11,081.65 | 11,438.10 | 4,512.46 | 5,235.45 | 5,596.95 | 5,958.45 | 6,156.47 | 6,354.50 |
|         | May       | 8,271.30  | 9,545.92  | 10,183.23 | 10,820.54 | 11,229.31 | 11,638.08 | 4,595.17 | 5,303.29 | 5,657.35 | 6,011.41 | 6,238.51 | 6,465.60 |
|         | June      | 8,499.02  | 9,756.96  | 10,385.93 | 11,014.89 | 11,481.76 | 11,948.62 | 4,721.68 | 5,420.53 | 5,769.96 | 6,119.39 | 6,378.75 | 6,638.12 |
|         | July      | 9,541.89  | 10,964.78 | 11,676.22 | 12,387.66 | 12,902.23 | 13,416.80 | 5,301.05 | 6,091.54 | 6,486.79 | 6,882.04 | 7,167.91 | 7,453.78 |
|         | August    | 10,971.59 | 12,724.11 | 13,600.37 | 14,476.63 | 14,962.97 | 15,449.30 | 6,095.33 | 7,068.95 | 7,555.76 | 8,042.57 | 8,312.76 | 8,582.95 |
|         | September | 11,077.14 | 12,972.35 | 13,919.96 | 14,867.57 | 15,244.75 | 15,621.93 | 6,153.97 | 7,206.86 | 7,733.31 | 8,259.76 | 8,469.31 | 8,678.85 |
|         | October   | 9,109.27  | 10,720.92 | 11,526.75 | 12,332.57 | 12,594.69 | 12,856.81 | 5,060.71 | 5,956.07 | 6,403.75 | 6,851.43 | 6,997.05 | 7,142.67 |
|         | November  | 7,220.66  | 8,529.79  | 9,184.35  | 9,838.92  | 10,018.09 | 10,197.26 | 4,011.48 | 4,738.77 | 5,102.42 | 5,466.07 | 5,565.60 | 5,665.14 |
|         | December  | 5,111.01  | 6,038.18  | 6,501.76  | 6,965.35  | 7,091.69  | 7,218.04  | 2,839.45 | 3,354.54 | 3,612.09 | 3,869.64 | 3,939.83 | 4,010.02 |

**Table S2.** Cost difference detail for Type-A (Erzurum)

| Building Types | Initial Investment Costs |           |                   |           |                        |      |           | Costs of Energy Consumption |      |           |                                      |           |                          |           |
|----------------|--------------------------|-----------|-------------------|-----------|------------------------|------|-----------|-----------------------------|------|-----------|--------------------------------------|-----------|--------------------------|-----------|
|                | P1 (window)              |           | P2 (wall)         |           | P3 (heating system)    |      |           | P4 (cooling system)         |      |           | P5 (natural gas)                     |           | P6 (electricity)         |           |
|                | [m <sup>2</sup> ]        | Cost (\$) | [m <sup>2</sup> ] | Cost (\$) | [kcalh <sup>-1</sup> ] | [m]  | Cost (\$) | [kcalh <sup>-1</sup> ]      | [kW] | Cost (\$) | [m <sup>3</sup> year <sup>-1</sup> ] | Cost (\$) | [kWhyear <sup>-1</sup> ] | Cost (\$) |
| Type-0         | -                        | -         | 141.12            | 8,528.81  | -                      | -    | -         | -                           | -    | -         | -                                    | -         | -                        | -         |
| Type-1         | 47.04                    | 3,220.91  | 94.08             | 5,685.87  | 4,070.26               | 3.02 | 241.95    | 2,023.04                    | 2.35 | 72.12     | 1,713.85                             | 538.12    | 925.20                   | 85.50     |
| Type-2         | 70.56                    | 4,831.36  | 70.56             | 4,264.40  | 5,994.27               | 4.44 | 356.31    | 3,034.57                    | 3.53 | 108.17    | 2,528.62                             | 793.95    | 1,387.81                 | 128.25    |
| Type-3         | 94.08                    | 6,441.81  | 47.04             | 2,842.94  | 8,029.40               | 5.95 | 477.29    | 4,046.09                    | 4.71 | 144.23    | 3,385.54                             | 1,063.01  | 1,850.41                 | 171.00    |
| Type-4         | 117.60                   | 8,052.27  | 23.52             | 1,421.47  | 10,201.04              | 7.56 | 606.37    | 4,662.65                    | 5.42 | 166.21    | 4,245.98                             | 1,333.18  | 2,684.35                 | 248.07    |
| Type-5         | 141.12                   | 9,662.72  | -                 | -         | 12,372.68              | 9.16 | 735.46    | 5,415.75                    | 6.30 | 193.06    | 5,106.42                             | 1,603.34  | 3,518.28                 | 325.13    |

**Table S3.** Cost difference detail for Type-A (Antalya)

| Building Types | Initial Investment Costs |           |                   |           |                        |      |           | Costs of Energy Consumption |       |           |                                      |           |                          |           |
|----------------|--------------------------|-----------|-------------------|-----------|------------------------|------|-----------|-----------------------------|-------|-----------|--------------------------------------|-----------|--------------------------|-----------|
|                | P1 (window)              |           | P2 (wall)         |           | P3 (heating system)    |      |           | P4 (cooling system)         |       |           | P5 (natural gas)                     |           | P6 (electricity)         |           |
|                | [m <sup>2</sup> ]        | Cost (\$) | [m <sup>2</sup> ] | Cost (\$) | [kcalh <sup>-1</sup> ] | [m]  | Cost (\$) | [kcalh <sup>-1</sup> ]      | [kW]  | Cost (\$) | [m <sup>3</sup> year <sup>-1</sup> ] | Cost (\$) | [kWhyear <sup>-1</sup> ] | Cost (\$) |
| Type-0         | -                        | -         | 141.12            | 8,032.75  | -                      | -    | -         | -                           | -     | -         | -                                    | -         | -                        | -         |
| Type-1         | 47.04                    | 3,220.91  | 94.08             | 5,355.16  | 846.65                 | 0.63 | 50.33     | 5,752.14                    | 6.69  | 205.05    | 409.65                               | 125.98    | 823.46                   | 76.10     |
| Type-2         | 70.56                    | 4,831.36  | 70.56             | 4,016.37  | 1,165.63               | 0.86 | 69.29     | 9,762.73                    | 11.35 | 348.01    | 589.74                               | 181.36    | 1,235.19                 | 114.15    |
| Type-3         | 94.08                    | 6,441.81  | 47.04             | 2,677.58  | 1,588.95               | 1.18 | 94.45     | 13,016.97                   | 15.14 | 464.02    | 794.56                               | 244.35    | 1,646.92                 | 152.20    |
| Type-4         | 117.60                   | 8,052.27  | 23.52             | 1,338.79  | 2,349.51               | 1.74 | 139.66    | 15,056.24                   | 17.51 | 536.71    | 1,002.96                             | 308.44    | 2,362.16                 | 218.29    |
| Type-5         | 141.12                   | 9,662.72  | -                 | -         | 3,110.07               | 2.30 | 184.87    | 17,095.51                   | 19.88 | 609.40    | 1,211.36                             | 372.53    | 3,077.40                 | 284.39    |

**Table S4.** Cost difference detail for Type-B (Erzurum)

| Building Types | Initial Investment Costs |           |                   |           |                        |      |           | Costs of Energy Consumption |      |           |                                      |           |                          |           |
|----------------|--------------------------|-----------|-------------------|-----------|------------------------|------|-----------|-----------------------------|------|-----------|--------------------------------------|-----------|--------------------------|-----------|
|                | P1 (window)              |           | P2 (wall)         |           | P3 (heating system)    |      |           | P4 (cooling system)         |      |           | P5 (natural gas)                     |           | P6 (electricity)         |           |
|                | [m <sup>2</sup> ]        | Cost (\$) | [m <sup>2</sup> ] | Cost (\$) | [kcalh <sup>-1</sup> ] | [m]  | Cost (\$) | [kcalh <sup>-1</sup> ]      | [kW] | Cost (\$) | [m <sup>3</sup> year <sup>-1</sup> ] | Cost (\$) | [kWhyear <sup>-1</sup> ] | Cost (\$) |
| Type-0         | -                        | -         | 141.12            | 8,528.81  | -                      | -    | -         | -                           | -    | -         | -                                    | -         | -                        | -         |
| Type-1         | 47.04                    | 3,458.54  | 94.08             | 5,685.87  | 2,421.46               | 1.79 | 143.94    | 1,112.05                    | 1.29 | 39.64     | 1,012.93                             | 318.05    | 474.26                   | 43.83     |
| Type-2         | 70.56                    | 5,187.81  | 70.56             | 4,264.40  | 3,566.56               | 2.64 | 212.01    | 1,668.07                    | 1.94 | 59.46     | 1,494.49                             | 469.25    | 711.39                   | 65.74     |
| Type-3         | 94.08                    | 6,917.07  | 47.04             | 2,842.94  | 4,777.29               | 3.54 | 283.97    | 2,224.10                    | 2.59 | 79.28     | 2,000.96                             | 628.27    | 948.53                   | 87.66     |
| Type-4         | 117.60                   | 8,646.34  | 23.52             | 1,421.47  | 6,063.86               | 4.49 | 360.45    | 2,553.82                    | 2.97 | 91.04     | 2,509.37                             | 787.91    | 1,368.91                 | 126.50    |
| Type-5         | 141.12                   | 10,375.61 | -                 | -         | 7,350.43               | 5.44 | 436.93    | 2,959.40                    | 3.44 | 105.49    | 3,017.79                             | 947.54    | 1,789.28                 | 165.35    |

**Table S5.** Cost difference detail for Type-B (Antalya)

| Building Types | Initial Investment Costs |           |                   |           |                        |      |           | Costs of Energy Consumption |      |           |                                      |           |                          |           |
|----------------|--------------------------|-----------|-------------------|-----------|------------------------|------|-----------|-----------------------------|------|-----------|--------------------------------------|-----------|--------------------------|-----------|
|                | P1 (window)              |           | P2 (wall)         |           | P3 (heating system)    |      |           | P4 (cooling system)         |      |           | P5 (natural gas)                     |           | P6 (electricity)         |           |
|                | [m <sup>2</sup> ]        | Cost (\$) | [m <sup>2</sup> ] | Cost (\$) | [kcalh <sup>-1</sup> ] | [m]  | Cost (\$) | [kcalh <sup>-1</sup> ]      | [kW] | Cost (\$) | [m <sup>3</sup> year <sup>-1</sup> ] | Cost (\$) | [kWhyear <sup>-1</sup> ] | Cost (\$) |
| Type-0         | -                        | -         | 141.12            | 8,032.75  | -                      | -    | -         | -                           | -    | -         | -                                    | -         | -                        | -         |
| Type-1         | 47.04                    | 4,478.45  | 94.08             | 5,355.16  | 1,258.72               | 0.93 | 105.44    | 3,169.76                    | 3.69 | 112.99    | 414.55                               | 127.49    | 468.96                   | 43.34     |
| Type-2         | 70.56                    | 6,717.67  | 70.56             | 4,016.37  | 1,783.74               | 1.32 | 151.96    | 4,754.65                    | 5.53 | 169.49    | 597.08                               | 183.62    | 703.43                   | 65.01     |
| Type-3         | 94.08                    | 8,956.90  | 47.04             | 2,677.58  | 2,413.10               | 1.79 | 204.68    | 6,339.53                    | 7.37 | 225.98    | 804.35                               | 247.36    | 937.91                   | 86.68     |
| Type-4         | 117.60                   | 11,196.12 | 23.52             | 1,338.79  | 3,229.81               | 2.39 | 257.40    | 6,963.85                    | 8.10 | 248.24    | 1,013.61                             | 311.71    | 1,270.29                 | 117.39    |
| Type-5         | 141.12                   | 13,435.35 | -                 | -         | 4,046.53               | 3.00 | 310.12    | 7,588.18                    | 8.83 | 270.50    | 1,222.87                             | 376.07    | 1,602.66                 | 148.11    |

**Table S6.** Cost difference detail for Type-C (Erzurum)

| Building Types | Initial Investment Costs |           |                   |           |                        |      |           | Costs of Energy Consumption |      |           |                                      |           |                          |           |
|----------------|--------------------------|-----------|-------------------|-----------|------------------------|------|-----------|-----------------------------|------|-----------|--------------------------------------|-----------|--------------------------|-----------|
|                | P1 (window)              |           | P2 (wall)         |           | P3 (heating system)    |      |           | P4 (cooling system)         |      |           | P5 (natural gas)                     |           | P6 (electricity)         |           |
|                | [m <sup>2</sup> ]        | Cost (\$) | [m <sup>2</sup> ] | Cost (\$) | [kcalh <sup>-1</sup> ] | [m]  | Cost (\$) | [kcalh <sup>-1</sup> ]      | [kW] | Cost (\$) | [m <sup>3</sup> year <sup>-1</sup> ] | Cost (\$) | [kWhyear <sup>-1</sup> ] | Cost (\$) |
| Type-0         | -                        | -         | 141.12            | 8,528.81  | -                      | -    | -         | -                           | -    | -         | -                                    | -         | -                        | -         |
| Type-1         | 47.04                    | 3,238.45  | 94.08             | 5,685.87  | 3,966.67               | 2.94 | 235.79    | 2,017.16                    | 2.35 | 71.91     | 1,674.55                             | 525.78    | 905.51                   | 83.68     |
| Type-2         | 70.56                    | 4,857.67  | 70.56             | 4,264.40  | 5,841.42               | 4.33 | 347.23    | 3,025.75                    | 3.52 | 107.86    | 2,470.62                             | 775.74    | 1,358.26                 | 125.52    |
| Type-3         | 94.08                    | 6,476.90  | 47.04             | 2,842.94  | 7,824.76               | 5.80 | 465.12    | 4,034.33                    | 4.69 | 143.81    | 3,307.89                             | 1,038.63  | 1,811.02                 | 167.36    |
| Type-4         | 117.60                   | 8,096.12  | 23.52             | 1,421.47  | 9,944.61               | 7.37 | 591.13    | 4,644.54                    | 5.40 | 165.56    | 4,148.68                             | 1,302.62  | 2,623.69                 | 242.46    |
| Type-5         | 141.12                   | 9,715.35  | -                 | -         | 12,064.45              | 8.94 | 717.14    | 5,391.29                    | 6.27 | 192.18    | 4,989.47                             | 1,566.62  | 3,436.35                 | 317.56    |

**Table S7.** Cost difference detail for Type-C (Antalya)

| Building Types | Initial Investment Costs |           |                   |           |                        |      |           | Costs of Energy Consumption |       |           |                                      |           |                          |           |
|----------------|--------------------------|-----------|-------------------|-----------|------------------------|------|-----------|-----------------------------|-------|-----------|--------------------------------------|-----------|--------------------------|-----------|
|                | P1 (window)              |           | P2 (wall)         |           | P3 (heating system)    |      |           | P4 (cooling system)         |       |           | P5 (natural gas)                     |           | P6 (electricity)         |           |
|                | [m <sup>2</sup> ]        | Cost (\$) | [m <sup>2</sup> ] | Cost (\$) | [kcalh <sup>-1</sup> ] | [m]  | Cost (\$) | [kcalh <sup>-1</sup> ]      | [kW]  | Cost (\$) | [m <sup>3</sup> year <sup>-1</sup> ] | Cost (\$) | [kWhyear <sup>-1</sup> ] | Cost (\$) |
| Type-0         | -                        | -         | 141.12            | 8,032.75  | -                      | -    | -         | -                           | -     | -         | -                                    | -         | -                        | -         |
| Type-1         | 47.04                    | 3,238.45  | 94.08             | 5,355.16  | 846.65                 | 0.63 | 50.33     | 5,746.26                    | 6.68  | 204.84    | 409.65                               | 125.98    | 803.77                   | 74.28     |
| Type-2         | 70.56                    | 4,857.67  | 70.56             | 4,016.37  | 1,165.63               | 0.86 | 69.29     | 9,753.91                    | 11.34 | 347.70    | 589.74                               | 181.36    | 1,205.65                 | 111.42    |
| Type-3         | 94.08                    | 6,476.90  | 47.04             | 2,677.58  | 1,588.95               | 1.18 | 94.45     | 13,005.21                   | 15.13 | 463.60    | 794.56                               | 244.35    | 1,607.53                 | 148.56    |
| Type-4         | 117.60                   | 8,096.12  | 23.52             | 1,338.79  | 2,349.51               | 1.74 | 139.66    | 15,038.13                   | 17.49 | 536.06    | 1,002.96                             | 308.44    | 2,301.50                 | 212.69    |
| Type-5         | 141.12                   | 9,715.35  | -                 | -         | 3,110.07               | 2.30 | 184.87    | 17,071.05                   | 19.85 | 608.53    | 1,211.36                             | 372.53    | 2,995.47                 | 276.82    |

**Table S8.** Cost difference detail for Type-D (Erzurum)

| Building Types | Initial Investment Costs |           |                   |           |                        |      |           | Costs of Energy Consumption |      |           |                                      |           |                          |           |
|----------------|--------------------------|-----------|-------------------|-----------|------------------------|------|-----------|-----------------------------|------|-----------|--------------------------------------|-----------|--------------------------|-----------|
|                | P1 (window)              |           | P2 (wall)         |           | P3 (heating system)    |      |           | P4 (cooling system)         |      |           | P5 (natural gas)                     |           | P6 (electricity)         |           |
|                | [m <sup>2</sup> ]        | Cost (\$) | [m <sup>2</sup> ] | Cost (\$) | [kcalh <sup>-1</sup> ] | [m]  | Cost (\$) | [kcalh <sup>-1</sup> ]      | [kW] | Cost (\$) | [m <sup>3</sup> year <sup>-1</sup> ] | Cost (\$) | [kWhyear <sup>-1</sup> ] | Cost (\$) |
| Type-0         | -                        | -         | 141.12            | 8,528.81  | -                      | -    | -         | -                           | -    | -         | -                                    | -         | -                        | -         |
| Type-1         | 47.04                    | 3,726.69  | 94.08             | 5,685.87  | 2,007.13               | 1.49 | 119.31    | 1,088.53                    | 1.27 | 38.80     | 855.71                               | 268.68    | 395.48                   | 36.55     |
| Type-2         | 70.56                    | 5,590.04  | 70.56             | 4,264.40  | 2,955.16               | 2.19 | 175.66    | 1,632.79                    | 1.90 | 58.20     | 1,262.50                             | 396.41    | 593.23                   | 54.82     |
| Type-3         | 94.08                    | 7,453.38  | 47.04             | 2,842.94  | 3,958.73               | 2.93 | 235.32    | 2,177.06                    | 2.53 | 77.61     | 1,690.35                             | 530.75    | 790.97                   | 73.10     |
| Type-4         | 117.60                   | 9,316.73  | 23.52             | 1,421.47  | 5,038.13               | 3.73 | 299.48    | 2,481.38                    | 2.89 | 88.45     | 2,120.16                             | 665.70    | 1,126.27                 | 104.08    |
| Type-5         | 141.12                   | 11,180.07 | -                 | -         | 6,117.53               | 4.53 | 363.64    | 2,861.55                    | 3.33 | 102.01    | 2,549.97                             | 800.65    | 1,461.56                 | 135.07    |

**Table S9.** Cost difference detail for Type-D (Antalya)

| Building Types | Initial Investment Costs |           |                   |           |                        |      |           | Costs of Energy Consumption |      |           |                                      |           |                          |           |
|----------------|--------------------------|-----------|-------------------|-----------|------------------------|------|-----------|-----------------------------|------|-----------|--------------------------------------|-----------|--------------------------|-----------|
|                | P1 (window)              |           | P2 (wall)         |           | P3 (heating system)    |      |           | P4 (cooling system)         |      |           | P5 (natural gas)                     |           | P6 (electricity)         |           |
|                | [m <sup>2</sup> ]        | Cost (\$) | [m <sup>2</sup> ] | Cost (\$) | [kcalh <sup>-1</sup> ] | [m]  | Cost (\$) | [kcalh <sup>-1</sup> ]      | [kW] | Cost (\$) | [m <sup>3</sup> year <sup>-1</sup> ] | Cost (\$) | [kWhyear <sup>-1</sup> ] | Cost (\$) |
| Type-0         | -                        | -         | 141.12            | 8,032.75  | -                      | -    | -         | -                           | -    | -         | -                                    | -         | -                        | -         |
| Type-1         | 47.04                    | 4,495.99  | 94.08             | 5,355.16  | 1,258.72               | 0.93 | 74.82     | 3,146.24                    | 3.66 | 112.15    | 414.55                               | 127.49    | 390.18                   | 36.06     |
| Type-2         | 70.56                    | 6,743.99  | 70.56             | 4,016.37  | 1,783.74               | 1.32 | 106.03    | 4,719.37                    | 5.49 | 168.23    | 597.08                               | 183.62    | 585.27                   | 54.09     |
| Type-3         | 94.08                    | 8,991.99  | 47.04             | 2,677.58  | 2,413.10               | 1.79 | 143.44    | 6,292.49                    | 7.32 | 224.31    | 804.35                               | 247.36    | 780.36                   | 72.11     |
| Type-4         | 117.60                   | 11,239.98 | 23.52             | 1,338.79  | 3,229.81               | 2.39 | 191.99    | 6,891.41                    | 8.01 | 245.66    | 1,013.61                             | 311.71    | 1,027.65                 | 94.97     |
| Type-5         | 141.12                   | 13,487.98 | -                 | -         | 4,046.53               | 3.00 | 240.54    | 7,490.34                    | 8.71 | 267.01    | 1,222.87                             | 376.07    | 1,274.94                 | 117.82    |
